# Supplementary material
Source: Springer Nature journal article supplement (https://www.springermedizin.de/resource/supplementary/12882_2013_731_MOESM2_ESM.pdf/9454582)

**Desirable components of OPIS, as identified by parents, patients and professionals**

**Main sources of information that influence perceptions of self-efficacy, as described by Bandura (1977)**

**Clinical care-giving support**

- information on treatment regimens
- video-learning tools
- condition-specific cartoons/puzzles
- a question and answer area

**Psychosocial support for care-giving**

- social-networking
- testimonials
- managing stress
- enhancing families health-care experiences

**Mastery experience**

**Verbal persuasion**

**Vicarious experience**

**Affective states**

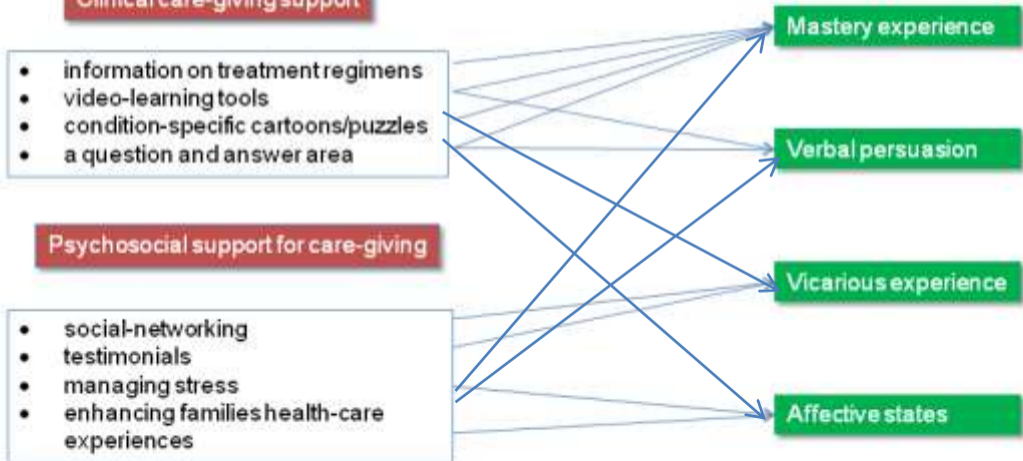

Supplement: MOESM2 [file 9454582]
